# Supplementary material for: Exploring Discussions About Virtual Reality on Twitter to Inform Brain Injury Rehabilitation: Content and Network Analysis
Source: PubMed Central journal article supplement (PMC10837760; doi:10.2196/45168), 2024-01-19
Supplement: jmir_v26i1e45168_app1.pdf [file jmir_v26i1e45168_app1.pdf]

## Good Reporting of a Mixed Methods Study (GRAMMS) Checklist

| Item | Guide questions/description                                                                 | Location    |
|------|---------------------------------------------------------------------------------------------|-------------|
| 1    | Describe the justification for using a mixed methods approach to the research question      | Pages 3-4   |
| 2    | Describe the design in terms of the purpose, priority and sequence of methods               | Pages 3-4   |
| 3    | Describe each method in terms of sampling, data collection and analysis                     | Pages 3-4   |
| 4    | Describe where integration has occurred, how it has occurred and who has participated in it | Pages 3-4   |
| 5    | Describe any limitation of one method associated with the presence of the other method      | Pages 11-14 |
| 6    | Describe any insights gained from mixing or integrating methods                             | Pages 11-14 |

The GRAMMS Checklist is from O'Cathain A, Murphy E, Nicholl J. The quality of mixed methods studies in health services research. *Journal of Health Services Research & Policy*. 2008;13(2):92-8. doi: 10.1258/jhsrp.2007.007074.
