# Supplementary material for: Exploring Discussions About Virtual Reality on Twitter to Inform Brain Injury Rehabilitation: Content and Network Analysis
Source: PubMed Central journal article supplement (PMC10837760; doi:10.2196/45168), 2024-01-19
Supplement: jmir_v26i1e45168_app4.pdf [file jmir_v26i1e45168_app4.pdf]

**Details on Original Tweets Related to ‘Talking About VR’ (N=3506)**

| Sub-Category<br>(Number of Original<br>Tweets)           | Number of<br>@Users | Description                                                                                                                                                                                                                                                                                                                                                                    | Example Tweet (Paraphrased)                                                                                                                                                         |
|----------------------------------------------------------|---------------------|--------------------------------------------------------------------------------------------------------------------------------------------------------------------------------------------------------------------------------------------------------------------------------------------------------------------------------------------------------------------------------|-------------------------------------------------------------------------------------------------------------------------------------------------------------------------------------|
| <b>General conversations about VR (n = 2904, 82.83%)</b> |                     |                                                                                                                                                                                                                                                                                                                                                                                |                                                                                                                                                                                     |
| VR experiences (n=1229)                                  | 867                 | <p>@Users provided details, descriptions, and opinions about a direct experience with VR (past or future). @Users also shared their VR purchases (eg, HMDs, accessories, games), or commented on their attendance at past or future VR events. Many of these tweets contained videos or photos of @users using VR, their VR set-up, or screencaps of their VR experiences.</p> | <p>It has arrived!!! Finally got my HMD #VR #oculus</p> <p>Had an incredible time in #VR</p> <p>Had a blast at our meetup in #VR. Was great to listen to all on the panel</p>       |
| Commentary on VR news or content (n=554)                 | 374                 | <p>Tweets where @users commented on or shared opinions about VR that was not related to a direct experience they had with VR (eg, commenting on news about VR apps, hardware, content updates, other @users’ VR experience, VR companies).</p>                                                                                                                                 | <p>Can’t wait for this #VR game! Looks amazing #fun #VirtualReality</p> <p>Not sure about the new update for [VR game]. Guess we will have to give it a go #gamer #VR</p>           |
| General commentary and conversations (n=520)             | 371                 | <p>Tweets where @users discussed a range of uses, topics, and opinions related to VR. Most of these were conversational tweets directed at other @users.</p>                                                                                                                                                                                                                   | <p>[@user] I’m glad that you’re enjoying the #VR game</p> <p>[@user] I would say that this #VR headset delivers a good gaming experience, but I can’t wait for the next release</p> |

| Sub-Category<br>(Number of Original<br>Tweets)             | Number of<br>@Users | Description                                                                                                                                                                                                                                                                                                                                                                                                                                         | Example Tweet (Paraphrased)                                                                                                                                                                                |
|------------------------------------------------------------|---------------------|-----------------------------------------------------------------------------------------------------------------------------------------------------------------------------------------------------------------------------------------------------------------------------------------------------------------------------------------------------------------------------------------------------------------------------------------------------|------------------------------------------------------------------------------------------------------------------------------------------------------------------------------------------------------------|
| VR potential and ideas<br>(n=295)                          | 266                 | Tweets were @users expressed their opinion and discussed the potential of VR both generally and in specific industries. This included the potential of VR in industries and uptake due to the COVID-19 pandemic (eg, for remote work, education, events). Alternatively, some @users discussed barriers to VR and its general potential. @Users suggested ideas for VR games, or expressed wanting cross platform games or support to be developed. | I see social #VR apps as a way to integrate custom worlds. What's stopping us?<br>#VirtualReality #future #tech<br><br>I have a suggestion. How cool would [video game] be in #VR? Someone make it happen! |
| Development insights and content (n=220)                   | 162                 | @Users described VR prototypes or content that they were developing and shared related pictures or videos.                                                                                                                                                                                                                                                                                                                                          | Still fixing up the shading but here's a sneak peek at my #VR development #GameDev                                                                                                                         |
| VR challenges (n=86)                                       | 67                  | Tweets where @users expressed opinions or discussed challenges with VR and the VR industry – including cost, privacy, lack of access, quality, and interaction mechanisms. Did not include tweets that provided information about personal experiences with VR issues or where @users sought advice or opinions.                                                                                                                                    | I think lack of hardware is an issue for many #VR developers<br><br>#VR isn't there in terms of quality of avatars and interaction methods. I feel more connected in online games.                         |
| <b>Seeking advice or opinions about VR (n=439, 12.52%)</b> |                     |                                                                                                                                                                                                                                                                                                                                                                                                                                                     |                                                                                                                                                                                                            |
| VR hardware and software (n=147)                           | 123                 | @Users asked for advice or opinions related to VR games (eg, which games/apps to play, stream or purchase, game features), or questions or wanted opinions about HMDs (eg, which HMD to purchase, are HMDs worth purchasing, cost of HMDs).                                                                                                                                                                                                         | What would be a fun #VR game to play?<br>#subscribe #games #VirtualReality #vr<br><br>Looking to buy #VR, what is the best #HMD?<br>#oculus #HTC                                                           |

| Sub-Category<br>(Number of Original<br>Tweets)                           | Number of<br>@Users | Description                                                                                                                                                                            | Example Tweet (Paraphrased)                                                                                                    |
|--------------------------------------------------------------------------|---------------------|----------------------------------------------------------------------------------------------------------------------------------------------------------------------------------------|--------------------------------------------------------------------------------------------------------------------------------|
| VR features, design, and development (n=103)                             | 71                  | @Users asked for opinions or advice related to features of VR and development (eg, game engines, graphics card requirements, streaming, technical barriers).                           | What mode are you using for #VR scenes?<br>#GameDevs #unity #indiedev                                                          |
| Issues with VR (n=63)                                                    | 23                  | @Users sought advice about issues that they had experienced with VR (eg, broken hardware, graphics glitches, connectivity problems).                                                   | Been trying to fix black screen #fail with my VR, any ideas you think can help??<br>#VirtualReality                            |
| VR industry (n=50)                                                       | 45                  | @Users asked for opinions or connections related to the VR industry.                                                                                                                   | Who are some #VR creators we can follow?<br>#GameDev #technology                                                               |
| VR uses (n=24)                                                           | 19                  | Seeking opinions about VR experiences or potential uses.                                                                                                                               | Anyone think #VR concerts will take off?                                                                                       |
| Other (n=52)                                                             | 48                  | Tweets that did not form larger content categories.                                                                                                                                    | Do you like watching 24 hours in #VR videos?                                                                                   |
| <b>User preferences and feedback about VR experiences (n=163, 4.65%)</b> |                     |                                                                                                                                                                                        |                                                                                                                                |
| Side effects of VR use (n=55)                                            | 47                  | Tweets with comments or information about VR side effects (eg, headaches, nausea, discomfort), including direct experiences and information about reducing potential for side effects. | Ughh I love playing #VR but this game has got me feeling so sick<br><br>I recommend taking it slow with seated #VR games first |
| Issues with VR (n=50)                                                    | 44                  | @Users shared and described problems they were experiencing with VR including with hardware (eg, HMDs, hand controllers), apps, audio issues, graphics issues, error messages.         | Can't get my VR game to work properly with audio #fail #VR #gamer                                                              |
| Design preferences or opinions (n=32)                                    | 31                  | @Users described or discussed preferences or opinions about design aspects of VR software or hardware (eg, field of view, degrees of freedom, scaling, image resolution).              | I prefer third person #VR games over first person view #games #gamer #VirtualReality                                           |

| Sub-Category<br>(Number of Original<br>Tweets) | Number of<br>@Users | Description                                                                                                                        | Example Tweet (Paraphrased)                                                                               |
|------------------------------------------------|---------------------|------------------------------------------------------------------------------------------------------------------------------------|-----------------------------------------------------------------------------------------------------------|
| Accessibility (n=26)                           | 20                  | Tweets related to making VR accessible for people who may experience limitations with access (eg, visual or physical impairments). | #Accessibility in #VR matters and developers should make experiences with custom options and seated games |
